# Supplementary material for: Oligodendrocytes Remodel the Genomic Fabrics of Functional Pathways in Astrocytes
Source: Preprints.org preprint supplement (doi:10.20944/preprints202004.0053.v1), 2020-04-06
Supplement: Supplementary file 1 [file supplementary]

Article

Oligodendrocytes remodel the genomic fabrics of functional pathways in astrocytes

Dumitru A Iacobas 1,2,*, Sanda Iacobas 3, Randy F Stout 4 and David C Spray 2,5

**Appendix A**

**Table S1:** Genes whose >1.5x absolute fold-change did not meet the individual CUT criterion. Red/green background of the expression ratio indicates not significant (false) up-/down-regulation.

| **Gene** | **Description** | **X** | **CUT** |
| --- | --- | --- | --- |
| Acap2 | ArfGAP with coiled-coil, ankyrin repeat and PH domains 2 | -1.540 | 1.816 |
| Adamts18 | a disintegrin-like and metallopeptidase | -1.514 | 1.594 |
| Akr1c12 | aldo-keto reductase family 1, member C12 | 1.866 | 1.994 |
| Alx3 | aristaless-like homeobox 3 | 1.536 | 1.769 |
| Alyref2 | Aly/REF export factor 2 | -1.880 | 2.208 |
| Ankrd33b | ankyrin repeat domain 33B | 1.593 | 1.829 |
| Ankrd45 | ankyrin repeat domain 45 | 1.514 | 1.984 |
| Ankrd50 | ankyrin repeat domain 50 | 1.628 | 1.832 |
| Ankrd61 | ankyrin repeat domain 61 | 1.645 | 1.802 |
| Arid1a | AT rich interactive domain 1A | -1.668 | 2.066 |
| Artn | artemin | 1.524 | 1.732 |
| Aspm | abnormal spindle microtubule assembly | -1.693 | 1.716 |
| Atp6v1e1 | ATPase, H+ transporting, lysosomal V1 subunit E1 | -1.679 | 1.777 |
| Bag4 | BCL2-associated athanogene 4 | 1.723 | 1.914 |
| Birc3 | baculoviral IAP repeat-containing 3 | -1.588 | 1.722 |
| Ccdc104 | coiled-coil domain containing 104 | -1.819 | 2.130 |
| Ccl2 | chemokine | -1.699 | 2.034 |
| Cdc20b | cell division cycle 20 homolog B | 1.512 | 1.605 |
| Cenpf | centromere protein F | 2.041 | 2.128 |
| Cep97 | centrosomal protein 97 | -1.641 | 1.723 |
| COX1 | mitochondrially encoded cytochrome c oxidase I | -1.607 | 1.650 |
| Cpsf7 | cleavage and polyadenylation specific factor 7 | -1.635 | 1.891 |
| Crct1 | cysteine-rich C-terminal 1 | -1.530 | 1.701 |
| Cul4b | cullin 4B | -1.550 | 1.574 |
| Cyp4a12b | cytochrome P450, family 4, subfamily a, polypeptide 12B | -1.628 | 1.751 |
| Ddx11 | DEAD/H | 2.057 | 2.228 |
| Defb1 | defensin beta 1 | -1.581 | 1.629 |
| Defb45 | defensin beta 45 | 1.986 | 2.226 |
| Deptor | DEP domain containing MTOR-interacting protein | 1.839 | 1.899 |
| Dmtf1 | cyclin D binding myb-like transcription factor 1 | -1.671 | 1.727 |
| Dnaic1 | dynein, axonemal, intermediate chain 1 | -1.533 | 1.859 |
| Dnmt3b | DNA methyltransferase 3B | -1.780 | 1.932 |
| Draxin | dorsal inhibitory axon guidance protein | 1.513 | 1.564 |
| Eda2r | ectodysplasin A2 receptor | -1.525 | 1.682 |
| Eif4g2 | eukaryotic translation initiation factor 4, gamma 2 | -2.150 | 2.324 |
| Exoc5 | exocyst complex component 5 | -1.553 | 1.778 |
| Fam110c | family with sequence similarity 110, member C | 1.617 | 1.818 |
| Fam124b | family with sequence similarity 124, member B | 1.502 | 1.509 |
| Fbxo34 | F-box protein 34 | -1.672 | 1.763 |
| Fech | ferrochelatase | -1.624 | 1.908 |
| Fgf18 | fibroblast growth factor 18 | 1.716 | 1.729 |
| Gdap10 | ganglioside-induced differentiation-associated-protein 10 | 1.558 | 1.681 |
| Gdf7 | growth differentiation factor 7 | 1.501 | 1.560 |
| Gfi1b | growth factor independent 1B | 1.512 | 1.919 |
| Glg1 | golgi apparatus protein 1 | -1.778 | 2.010 |
| Gpr3 | G-protein coupled receptor 3 | -1.644 | 1.664 |
| Gpx2 | glutathione peroxidase 2 | -1.527 | 1.794 |
| Gria2 | glutamate receptor, ionotropic, AMPA2 | 1.760 | 2.147 |
| H2-Ke2 | H2-K region expressed gene 2 | -1.584 | 1.631 |
| H2-Q4 | histocompatibility 2, Q region locus 4 | 1.612 | 2.316 |
| Herc6 | hect domain and RLD 6 | 2.162 | 2.204 |
| Hirip3 | HIRA interacting protein 3 | -1.636 | 1.877 |
| Hmga2 | high mobility group AT-hook 2 | 1.759 | 1.844 |
| Hnrnpa2b1 | heterogeneous nuclear ribonucleoprotein A2/B1 | 2.005 | 2.434 |
| Hoxb6 | homeobox B6 | 1.860 | 2.061 |
| Hsd17b4 | hydroxysteroid | -1.658 | 1.933 |
| Id2 | inhibitor of DNA binding 2 | -1.647 | 1.665 |
| Igh-VJ558 | immunoglobulin heavy chain | -1.723 | 1.898 |
| Il11 | interleukin 11 | -1.777 | 1.835 |
| Isoc1 | isochorismatase domain containing 1 | -1.648 | 2.044 |
| Itpripl2 | inositol 1,4,5-triphosphate receptor interacting protein-like 2 | -1.523 | 1.812 |
| Kcna5 | potassium voltage-gated channel, shaker-related subfamily, member 5 | 1.800 | 1.842 |
| Kcnip1 | Kv channel-interacting protein 1 | -1.519 | 1.521 |
| Klk11 | kallikrein related-peptidase 11 | -1.982 | 2.027 |
| Kpna7 | karyopherin alpha 7 | -1.547 | 1.627 |
| Krt6b | keratin 6B | 1.647 | 1.826 |
| Lamtor1 | late endosomal/lysosomal adaptor, MAPK and MTOR activator 1 | -1.726 | 1.745 |
| Lrrc29 | leucine rich repeat containing 29 | 1.696 | 1.845 |
| Lrrc48 | leucine rich repeat containing 48 | 2.168 | 2.295 |
| Lrrc66 | leucine rich repeat containing 66 | 1.705 | 2.131 |
| Mad2l1bp | MAD2L1 binding protein | 1.523 | 1.530 |
| Megf10 | multiple EGF-like-domains 10 | -1.644 | 1.702 |
| Mgat2 | mannoside acetylglucosaminyltransferase 2 | 1.606 | 1.740 |
| Mios | missing oocyte, meiosis regulator, homolog | 1.653 | 1.669 |
| Mpp5 | membrane protein, palmitoylated 5 | -1.551 | 1.908 |
| Mrpl11 | mitochondrial ribosomal protein L11 | -1.562 | 2.125 |
| Mrs2 | MRS2 magnesium homeostasis factor homolog | -1.597 | 1.695 |
| Mthfs | 5, 10-methenyltetrahydrofolate synthetase | 1.680 | 1.793 |
| Mtss1l | metastasis suppressor 1-like | -1.580 | 1.669 |
| Myo5b | myosin VB | -1.829 | 2.143 |
| Nat8l | N-acetyltransferase 8-like | -1.661 | 2.099 |
| Net1 | neuroepithelial cell transforming gene 1 | -1.686 | 2.039 |
| Nfat5 | nuclear factor of activated T cells 5 | -1.740 | 1.791 |
| Ngb | neuroglobin | 1.561 | 1.665 |
| Noc4l | nucleolar complex associated 4 homolog | 1.697 | 1.948 |
| Notch3 | notch 3 | -1.634 | 1.798 |
| Nox4 | NADPH oxidase 4 | 1.595 | 2.030 |
| Olfr417 | olfactory receptor 417 | 1.573 | 1.862 |
| Pappa | pregnancy-associated plasma protein A | -1.608 | 2.168 |
| Pcnt | pericentrin | -1.641 | 2.572 |
| Pdf | peptide deformylase | -1.593 | 1.830 |
| Pdxk | pyridoxal | -1.671 | 1.798 |
| Pebp1 | phosphatidylethanolamine binding protein 1 | -1.517 | 1.852 |
| Pias1 | protein inhibitor of activated STAT 1 | 1.751 | 1.905 |
| Pipox | pipecolic acid oxidase | -1.548 | 1.973 |
| Plekhb1 | pleckstrin homology domain containing, family B | 1.514 | 1.566 |
| Pm20d1 | peptidase M20 domain containing 1 | -1.538 | 1.665 |
| Polr1d | polymerase | -1.707 | 1.914 |
| Prr13 | proline rich 13 | 1.908 | 1.915 |
| Psg19 | pregnancy specific glycoprotein 19 | 1.602 | 2.148 |
| Pthlh | parathyroid hormone-like peptide | -1.545 | 1.905 |
| Ptprn | protein tyrosine phosphatase, receptor type, N | 1.849 | 1.955 |
| Ptx4 | pentraxin 4 | 1.571 | 1.667 |
| Rffl | ring finger and FYVE like domain containing protein | 1.900 | 1.988 |
| Rhox3h | reproductive homeobox 3H | 2.043 | 2.074 |
| Rn18s | 18S ribosomal RNA | 1.838 | 1.998 |
| Rnf139 | ring finger protein 139 | -1.728 | 1.754 |
| Rpl19 | ribosomal protein L19 | -1.590 | 1.977 |
| Rpl5 | ribosomal protein L5 | -1.604 | 2.085 |
| Rplp2 | ribosomal protein, large P2 | -1.709 | 2.297 |
| Rpp21 | ribonuclease P 21 subunit | -1.678 | 1.720 |
| Rtn4rl2 | reticulon 4 receptor-like 2 | 1.614 | 1.816 |
| Samd8 | sterile alpha motif domain containing 8 | 1.536 | 1.758 |
| Sec61b | Sec61 beta subunit | -1.683 | 1.812 |
| Senp5 | SUMO/sentrin specific peptidase 5 | 1.619 | 2.074 |
| Serpinb3c | serine | -1.606 | 1.750 |
| Sfn | stratifin | 1.761 | 2.195 |
| Slc38a11 | solute carrier family 38, member 11 | 1.538 | 2.052 |
| Slc6a5 | solute carrier family 6 | 1.890 | 1.984 |
| Smim5 | small integral membrane protein 5 | -1.850 | 2.290 |
| Snord116 | Pwcr1 mRNA, complete sequence. | 2.012 | 2.167 |
| Snrpg | small nuclear ribonucleoprotein polypeptide G | -1.554 | 1.926 |
| Stmn4 | stathmin-like 4 | 1.546 | 1.679 |
| Stpg2 | sperm tail PG rich repeat containing 2 | 1.628 | 2.123 |
| Syt1 | synaptotagmin I | 1.992 | 2.153 |
| Syt6 | synaptotagmin VI | 1.670 | 1.671 |
| Tal1 | T cell acute lymphocytic leukemia 1 | 1.660 | 1.763 |
| Tbccd1 | TBCC domain containing 1 | -1.509 | 1.688 |
| Thoc3 | THO complex 3 | -1.643 | 2.254 |
| Thoc5 | THO complex 5 | -1.582 | 1.666 |
| Tinagl1 | tubulointerstitial nephritis antigen-like 1 | -1.585 | 1.676 |
| Tm9sf1 | transmembrane 9 superfamily member 1 | -1.664 | 2.007 |
| Tmem201 | transmembrane protein 201 | 1.732 | 2.208 |
| Tmem242 | transmembrane protein 242 | -1.592 | 1.721 |
| Tspan32 | tetraspanin 32 | 1.562 | 1.833 |
| Ubl3 | ubiquitin-like 3 | -1.521 | 1.786 |
| Vpreb3 | pre-B lymphocyte gene 3 | -1.692 | 1.709 |
| Zbed3 | zinc finger, BED domain containing 3 | 1.615 | 1.643 |
| Zc3h14 | zinc finger CCCH type containing 14 | -1.850 | 2.064 |
| Zfml | zinc finger, matrin-like | -1.694 | 1.794 |
| Zfp235 | zinc finger protein 235 | 1.776 | 1.821 |
| Zfp354b | zinc finger protein 354B | -1.883 | 1.901 |
| Zkscan5 | zinc finger with KRAB and SCAN domains 5 | -1.671 | 1.834 |

**Table S2:** Genes considered as significantly up-regulated although their absolute fold-change was below the traditional 1.5x.

| **Gene** | **Description** | **X** | **CUT** |
| --- | --- | --- | --- |
| Adora2b | adenosine A2b receptor | 1.441 | 1.194 |
| Anapc2 | anaphase promoting complex subunit 2 | 1.230 | 1.087 |
| Arrb1 | arrestin, beta 1 | 1.167 | 1.138 |
| Arrb2 | arrestin, beta 2 | 1.264 | 1.216 |
| Atg2a | autophagy related 2A | 1.173 | 1.160 |
| Ccl5 | chemokine | 1.488 | 1.371 |
| Cd37 | CD37 antigen | 1.413 | 1.153 |
| Cd38 | CD38 antigen | 1.335 | 1.224 |
| Chuk | conserved helix-loop-helix ubiquitous kinase | 1.100 | 1.097 |
| Col6a1 | collagen, type VI, alpha 1 | 1.258 | 1.217 |
| Col9a2 | collagen, type IX, alpha 2 | 1.239 | 1.233 |
| Ctsb | cathepsin B | 1.460 | 1.250 |
| Ednrb | endothelin receptor type B | 1.428 | 1.245 |
| Eif2s1 | eukaryotic translation initiation factor 2, subunit 1 alpha | 1.274 | 1.242 |
| Fgf1 | fibroblast growth factor 1 | 1.442 | 1.218 |
| Fgf9 | fibroblast growth factor 9 | 1.498 | 1.250 |
| Fgr | Gardner-Rasheed feline sarcoma viral | 1.330 | 1.269 |
| Foxo1 | forkhead box O1 | 1.401 | 1.107 |
| G6pc3 | glucose 6 phosphatase, catalytic, 3 | 1.212 | 1.163 |
| Glul | glutamate-ammonia ligase | 1.433 | 1.260 |
| Gnal | guanine nucleotide binding protein, alpha stimulating, olfactory type | 1.337 | 1.329 |
| Gng11 | guanine nucleotide binding protein | 1.195 | 1.192 |
| Gng3 | guanine nucleotide binding protein | 1.443 | 1.254 |
| Gsn | gelsolin | 1.269 | 1.267 |
| Gucy1b2 | guanylate cyclase 1, soluble, beta 2 | 1.346 | 1.268 |
| Igbp1 | immunoglobulin | 1.131 | 1.130 |
| Igf1 | insulin-like growth factor 1 | 1.330 | 1.245 |
| Itga9 | integrin alpha 9 | 1.299 | 1.193 |
| Itgb2 | integrin beta 2 | 1.403 | 1.155 |
| Jak1 | Janus kinase 1 | 1.143 | 1.135 |
| Limk1 | LIM-domain containing, protein kinase | 1.289 | 1.239 |
| Mad2l2 | MAD2 mitotic arrest deficient-like 2 | 1.443 | 1.335 |
| Mapk3 | mitogen-activated protein kinase 3 | 1.379 | 1.324 |
| Med24 | mediator complex subunit 24 | 1.260 | 1.242 |
| Naip2 | NLR family, apoptosis inhibitory protein 2 | 1.249 | 1.203 |
| Ncf1 | neutrophil cytosolic factor 1 | 1.325 | 1.183 |
| Nod1 | nucleotide-binding oligomerization domain containing 1 | 1.327 | 1.196 |
| Nos3 | nitric oxide synthase 3, endothelial cell | 1.274 | 1.225 |
| Panx1 | pannexin 1 | 1.423 | 1.138 |
| Pde1b | phosphodiesterase 1B, Ca2+-calmodulin dependent | 1.402 | 1.145 |
| Phka2 | phosphorylase kinase alpha 2 | 1.165 | 1.090 |
| Pik3r5 | phosphoinositide-3-kinase, regulatory subunit 5, p101 | 1.345 | 1.179 |
| Pik3r6 | phosphoinositide-3-kinase, regulatory subunit 6 | 1.093 | 1.092 |
| Pip4k2c | phosphatidylinositol-5-phosphate 4-kinase, type II, gamma | 1.131 | 1.079 |
| Rac3 | RAS-related C3 botulinum substrate 3 | 1.262 | 1.170 |
| Rbck1 | RanBP-type and C3HC4-type zinc finger containing 1 | 1.228 | 1.122 |
| Slc2a1 | solute carrier family 2 | 1.497 | 1.408 |
| Sphk2 | sphingosine kinase 2 | 1.179 | 1.117 |
| Ssh3 | slingshot homolog 3 | 1.309 | 1.161 |
| Syk | spleen tyrosine kinase | 1.219 | 1.131 |
| Tab1 | TGF-beta activated kinase 1/MAP3K7 binding protein 1 | 1.249 | 1.056 |
| Tbc1d4 | TBC1 domain family, member 4 | 1.392 | 1.365 |
| Tgfb1 | transforming growth factor, beta 1 | 1.372 | 1.311 |
| Ticam1 | toll-like receptor adaptor molecule 1 | 1.285 | 1.246 |
| Tsc2 | tuberous sclerosis 2 | 1.222 | 1.218 |
| Txnip | thioredoxin interacting protein | 1.304 | 1.250 |

**Table S3:** Genes considered as significantly down-regulated although their absolute fold-change was below the traditional 1.5x.

| **Gene** | **Description** | **X** | **CUT** |
| --- | --- | --- | --- |
| Adcy2 | adenylate cyclase 2 | -1.267 | 1.214 |
| Adrb3 | adrenergic receptor, beta 3 | -1.437 | 1.432 |
| Antxr2 | anthrax toxin receptor 2 | -1.340 | 1.232 |
| Arhgef6 | Rac/Cdc42 guanine nucleotide exchange factor | -1.384 | 1.200 |
| Atg16l2 | autophagy related 16-like 2 | -1.485 | 1.242 |
| Bcar1 | breast cancer anti-estrogen resistance 1 | -1.438 | 1.229 |
| Bcl2l1 | BCL2-like 1 | -1.395 | 1.242 |
| Bdnf | brain derived neurotrophic factor | -1.488 | 1.221 |
| Braf | Braf transforming gene | -1.241 | 1.209 |
| Bub1 | budding uninhibited by benzimidazoles 1 homolog | -1.470 | 1.362 |
| Camk2d | calcium/calmodulin-dependent protein kinase II, delta | -1.182 | 1.152 |
| Casp1 | caspase 1 | -1.388 | 1.231 |
| Ccna2 | cyclin A2 | -1.348 | 1.195 |
| Cdc14b | CDC14 cell division cycle 14B | -1.231 | 1.221 |
| Cdc20 | cell division cycle 20 | -1.311 | 1.166 |
| Cdc25a | cell division cycle 25A | -1.227 | 1.226 |
| Cdk2 | cyclin-dependent kinase 2 | -1.482 | 1.226 |
| Cdk6 | cyclin-dependent kinase 6 | -1.338 | 1.228 |
| Cfl2 | cofilin 2, muscle | -1.355 | 1.287 |
| Col1a1 | collagen, type I, alpha 1 | -1.497 | 1.455 |
| Col1a2 | collagen, type I, alpha 2 | -1.318 | 1.176 |
| Col2a1 | collagen, type II, alpha 1 | -1.281 | 1.128 |
| Creb3l4 | cAMP responsive element binding protein 3-like 4 | -1.267 | 1.256 |
| Cry1 | cryptochrome 1 | -1.227 | 1.198 |
| Ctnnb1 | catenin | -1.305 | 1.285 |
| Cxcr3 | chemokine | -1.375 | 1.134 |
| E2f1 | E2F transcription factor 1 | -1.255 | 1.168 |
| Eif2ak3 | eukaryotic translation initiation factor 2 alpha kinase 3 | -1.444 | 1.269 |
| Fadd | Fas (TNFRSF6)-associated via death domain | -1.123 | 1.115 |
| Fgd3 | FYVE, RhoGEF and PH domain containing 3 | -1.244 | 1.209 |
| Flt3l | FMS-like tyrosine kinase 3 ligand | -1.286 | 1.275 |
| Gadd45a | growth arrest and DNA-damage-inducible 45 alpha | -1.342 | 1.190 |
| Gadd45b | growth arrest and DNA-damage-inducible 45 beta | -1.378 | 1.223 |
| Gbp5 | guanylate binding protein 5 | -1.335 | 1.326 |
| Gjc1 | gap junction protein, gamma 1 | -1.316 | 1.142 |
| Gnaq | guanine nucleotide binding protein, alpha q polypeptide | -1.284 | 1.220 |
| Gng12 | guanine nucleotide binding protein | -1.282 | 1.161 |
| Gng2 | guanine nucleotide binding protein | -1.134 | 1.099 |
| Hif1a | hypoxia inducible factor 1, alpha subunit | -1.361 | 1.235 |
| Hsp90b1 | heat shock protein 90, beta | -1.183 | 1.145 |
| Ins2 | insulin II | -1.334 | 1.194 |
| Insr | insulin receptor | -1.337 | 1.315 |
| Iqgap1 | IQ motif containing GTPase activating protein 1 | -1.416 | 1.183 |
| Iqgap2 | IQ motif containing GTPase activating protein 2 | -1.391 | 1.248 |
| Iqgap3 | IQ motif containing GTPase activating protein 3 | -1.478 | 1.316 |
| Itgav | integrin alpha V | -1.434 | 1.294 |
| Itgb5 | integrin beta 5 | -1.368 | 1.160 |
| Itpr1 | inositol 1,4,5-trisphosphate receptor 1 | -1.338 | 1.127 |
| Lama2 | laminin, alpha 2 | -1.438 | 1.255 |
| Mad2l1 | MAD2 mitotic arrest deficient-like 1 | -1.484 | 1.393 |
| Mapk12 | mitogen-activated protein kinase 12 | -1.350 | 1.324 |
| Mapk8 | mitogen-activated protein kinase 8 | -1.356 | 1.317 |
| Mcl1 | myeloid cell leukemia sequence 1 | -1.166 | 1.123 |
| Mcm2 | minichromosome maintenance deficient 2 mitotin | -1.399 | 1.304 |
| Mcm4 | minichromosome maintenance deficient 4 homolog | -1.398 | 1.185 |
| Mcm7 | minichromosome maintenance deficient 7 | -1.320 | 1.229 |
| Mdm2 | transformed mouse 3T3 cell double minute 2 | -1.301 | 1.270 |
| Med30 | mediator complex subunit 30 | -1.199 | 1.164 |
| Msn | moesin | -1.330 | 1.137 |
| Myl2 | myosin, light polypeptide 2, regulatory, cardiac, slow | -1.386 | 1.361 |
| Orc2 | origin recognition complex, subunit 2 | -1.273 | 1.212 |
| Orc6 | origin recognition complex, subunit 6 | -1.195 | 1.171 |
| P2ry1 | purinergic receptor P2Y, G-protein coupled 1 | -1.213 | 1.119 |
| Pak3 | p21 protein | -1.350 | 1.189 |
| Pdgfc | platelet-derived growth factor, C polypeptide | -1.328 | 1.114 |
| Per2 | period circadian clock 2 | -1.372 | 1.232 |
| Pfn1 | profilin 1 | -1.342 | 1.341 |
| Phlpp1 | PH domain and leucine rich repeat protein phosphatase 1 | -1.144 | 1.111 |
| Pkn3 | protein kinase N3 | -1.341 | 1.185 |
| Ppp1r12a | protein phosphatase 1, regulatory | -1.292 | 1.288 |
| Prkaa2 | protein kinase, AMP-activated, alpha 2 catalytic subunit | -1.499 | 1.190 |
| Rad21 | RAD21 homolog | -1.340 | 1.276 |
| Rb1cc1 | RB1-inducible coiled-coil 1 | -1.233 | 1.129 |
| Rbl1 | retinoblastoma-like 1 | -1.470 | 1.362 |
| Rcan1 | regulator of calcineurin 1 | -1.246 | 1.184 |
| Rock1 | Rho-associated coiled-coil containing protein kinase 1 | -1.263 | 1.237 |
| Rock2 | Rho-associated coiled-coil containing protein kinase 2 | -1.329 | 1.311 |
| Shc3 | src homology 2 domain-containing transforming protein C3 | -1.307 | 1.227 |
| Slc16a10 | solute carrier family 16 | -1.320 | 1.215 |
| Smad2 | SMAD family member 2 | -1.205 | 1.134 |
| Smc1a | structural maintenance of chromosomes 1A | -1.344 | 1.239 |
| Spp1 | secreted phosphoprotein 1 | -1.448 | 1.406 |
| Stat2 | signal transducer and activator of transcription 2 | -1.463 | 1.273 |
| Tbk1 | TANK-binding kinase 1 | -1.332 | 1.225 |
| Tgfb3 | transforming growth factor, beta 3 | -1.394 | 1.199 |
| Thbs3 | thrombospondin 3 | -1.321 | 1.096 |
| Thrb | thyroid hormone receptor beta | -1.361 | 1.221 |
| Trpc1 | transient receptor potential cation channel, subfamily C, member 1 | -1.221 | 1.188 |
| Trpv2 | transient receptor potential cation channel, subfamily V, member 2 | -1.215 | 1.101 |
| Tsc1 | tuberous sclerosis 1 | -1.185 | 1.164 |
| Uvrag | UV radiation resistance associated gene | -1.416 | 1.245 |
| Vav3 | vav 3 oncogene | -1.234 | 1.225 |
| Vegfc | vascular endothelial growth factor C | -1.307 | 1.089 |
| Wee1 | WEE 1 homolog 1 | -1.195 | 1.124 |
| Ywhah | tyrosine 3-monooxygenase/tryptophan 5-monooxygenase activation protein, eta polypeptide | -1.360 | 1.307 |

Figure S1


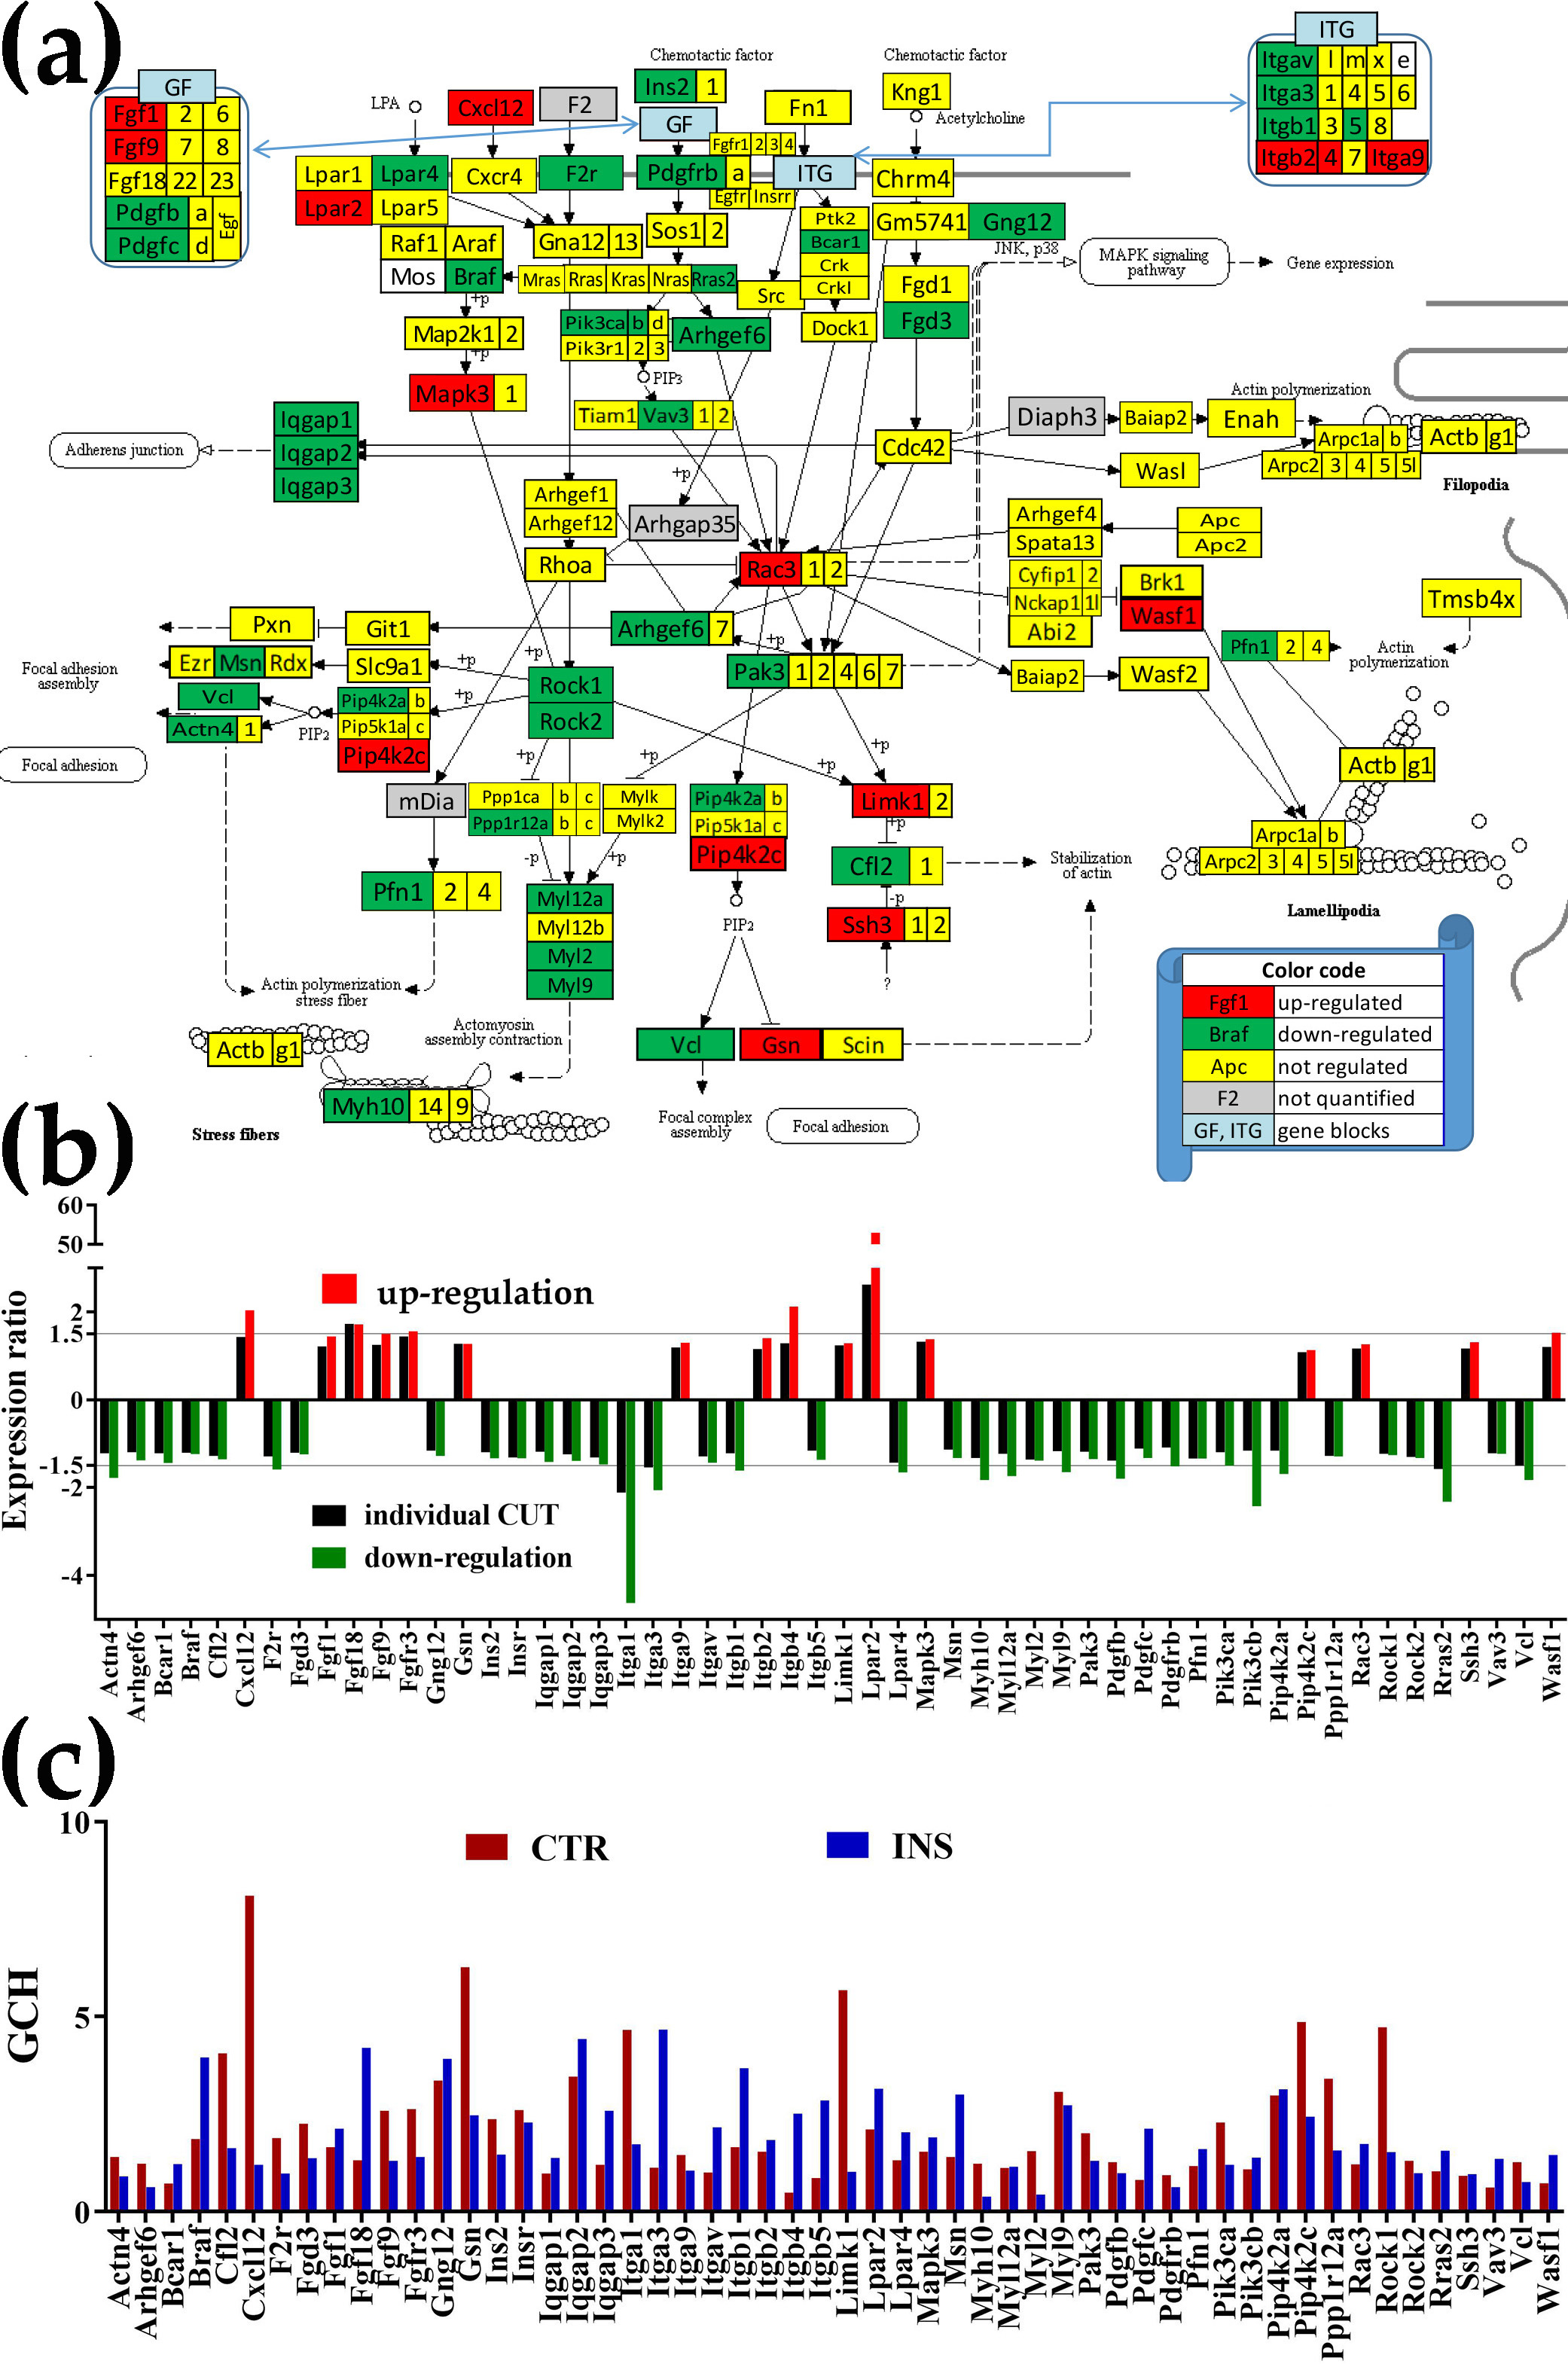


**Figure S1:** Presence of non-touching precursor oligodendrocytes regulate the actin cytoskeleton (AC) pathway. **(a)** Regulation of interconnected genes with the AC pathway. **(b)** Expression ratios and individual fold-change cut-offs (negative for down-regulation) of the significantly regulated genes.Note that regulation of several genes would be neglected by the traditional analysis, while for others the individual gene cut-off exceeded 1.5x. **(c)** Oli-neu proximity changes the gene hierarchy.The display is limited to the significantly regulated genes plus the actins: *Actb, Actg1* and *Actn1.* The dominant gene in this pathway is *Pip4k2c* with GCH = 15.00 in INS.

Figure S2


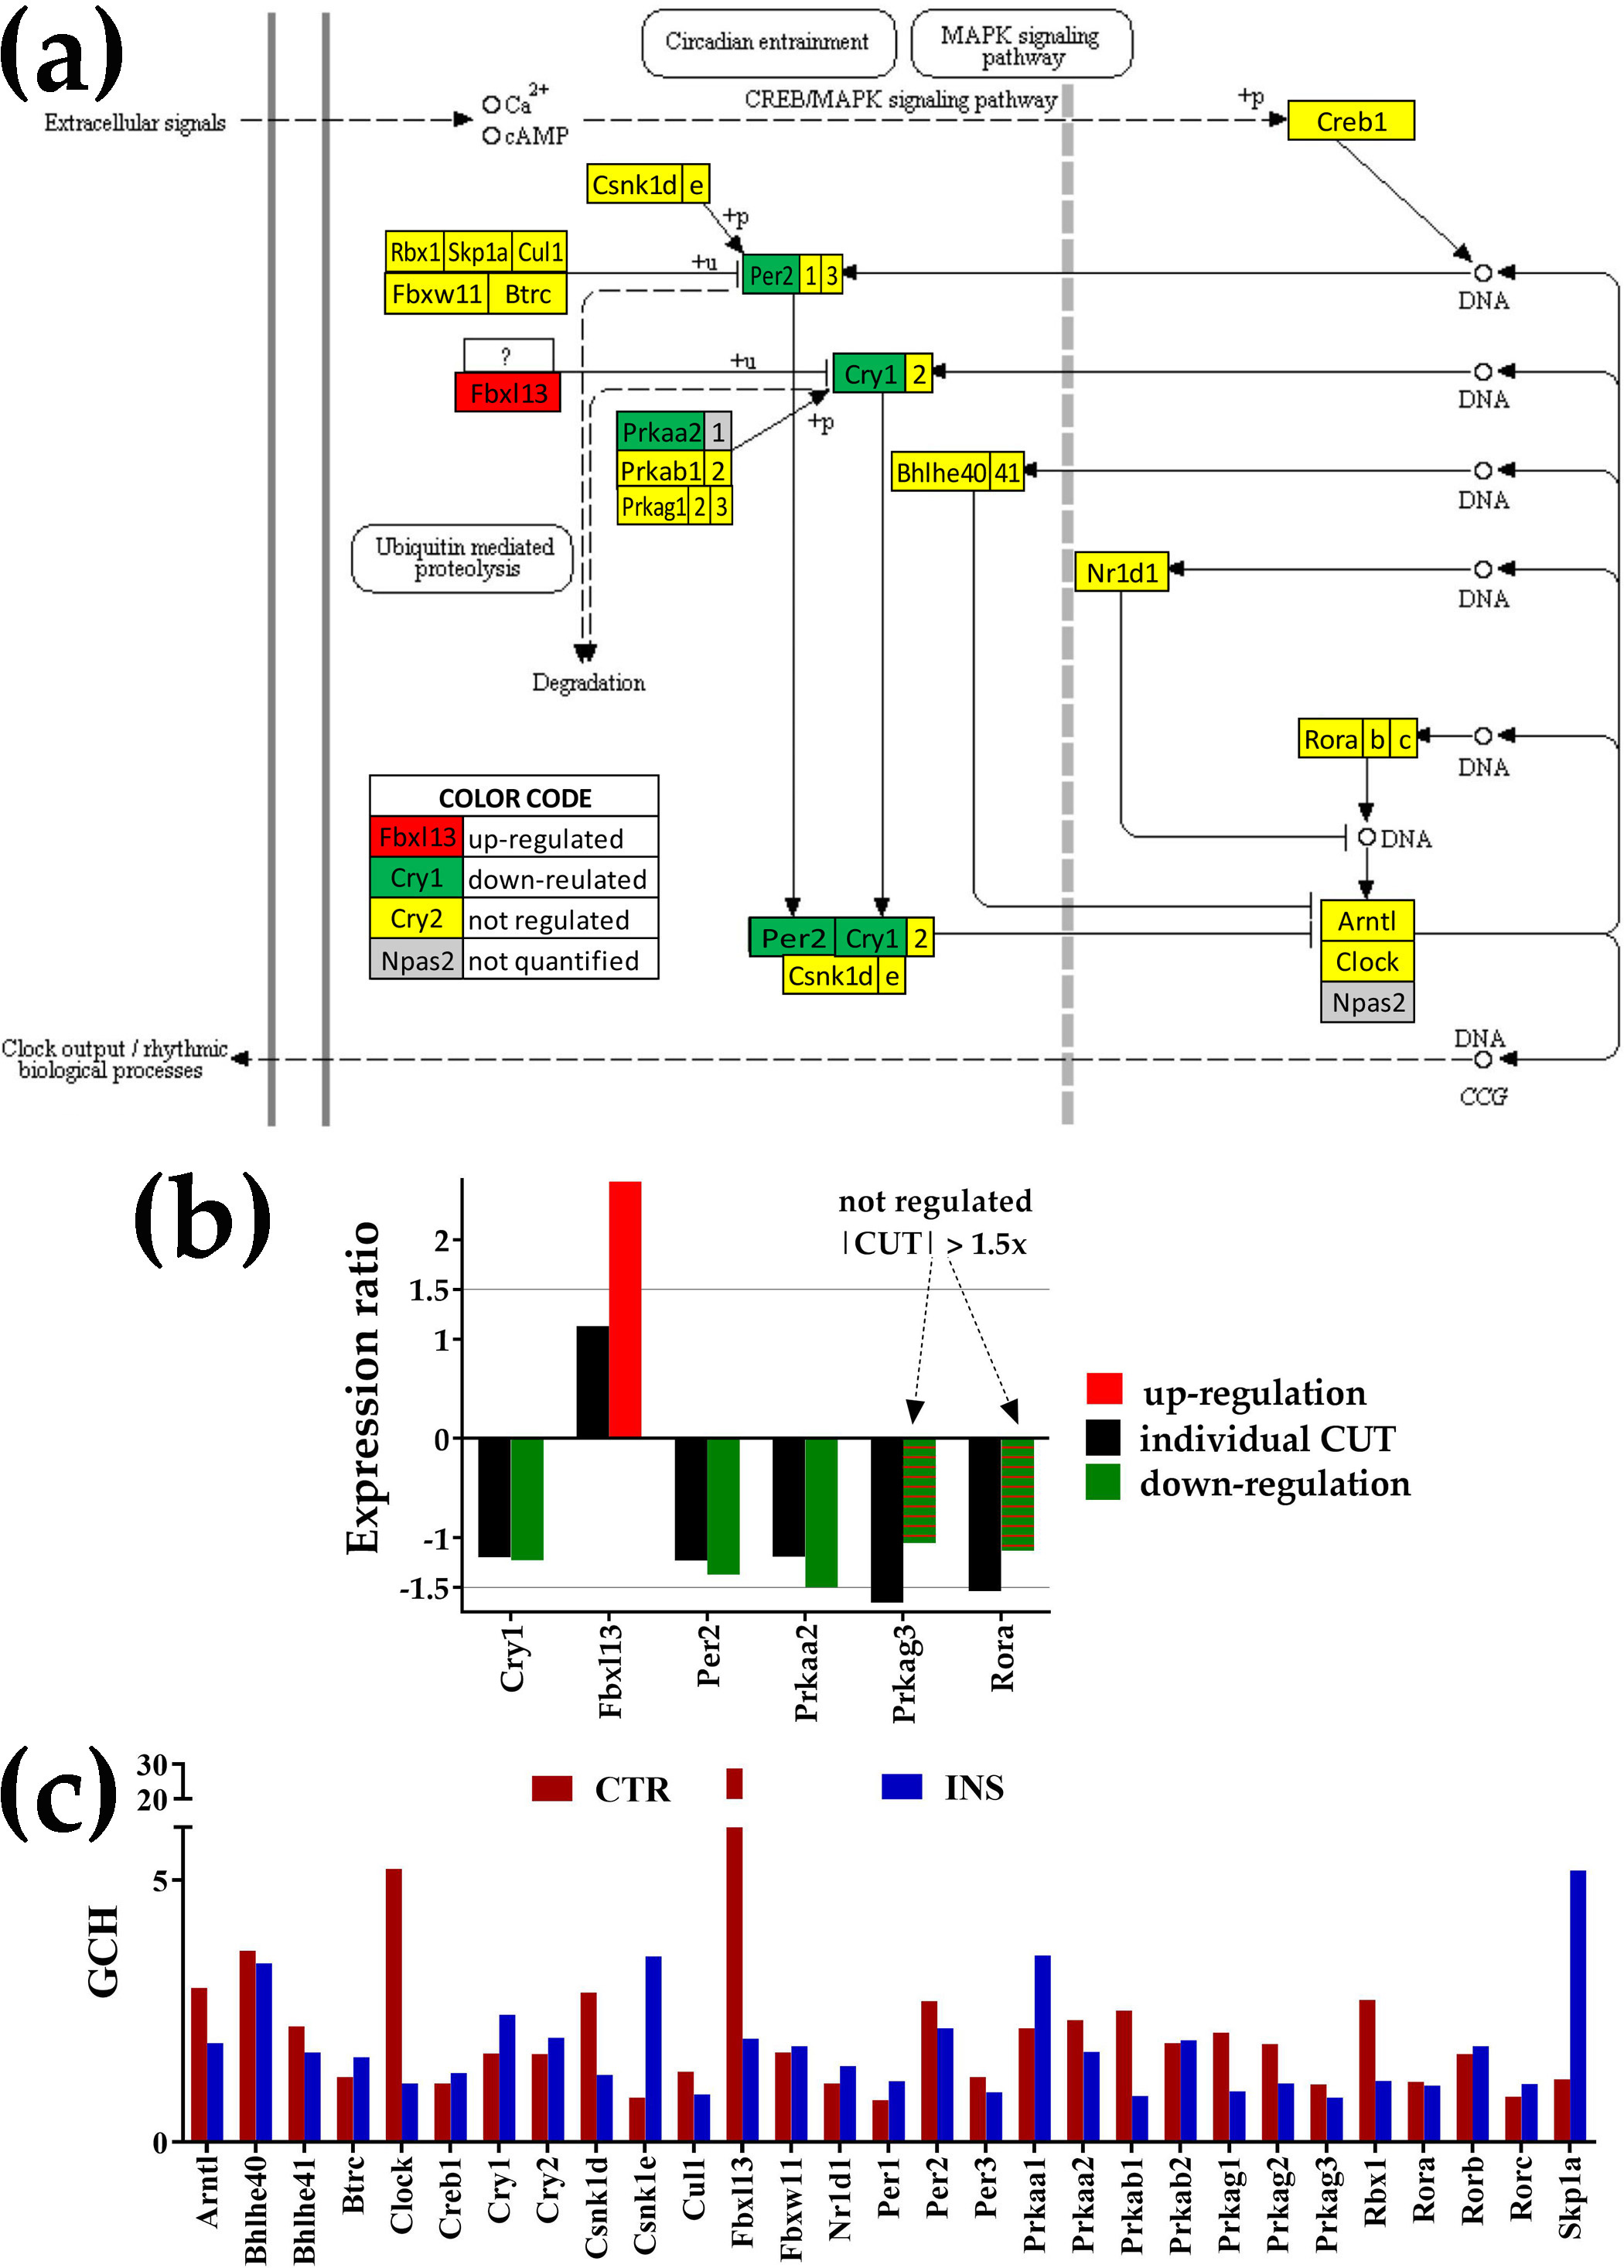


**Figure S2:** Presence of non-touching precursor oligodendrocytes regulates the Circadian Rhythm

(CR) pathway. **(a)** Regulation of the interconnected genes within CC pathway. **(b)** Expression ratios and individual fold-change cut-offs (negative for down-regulation) of the significantly regulated genes.Note that regulation of *Cry1* and *Per2*2 would be neglected by the traditional analysis and that the individual gene cut-off for *Prkag3* and *Rora* exceeded 1.5x. **(c)** Changes in the gene commanding height (GCH) scores.The most prominent gene, towering by far all other genes in the CTR astrocytes is *Fbxl13* (GCH = 28.82).
